# Supplementary material for: Mild Hyperthermia Responsive Liposomes for Enhanced In Vitro and In Vivo Anticancer Efficacy of Doxorubicin against Hepatocellular Carcinoma
Source: MDPI journal article supplement (doi:10.3390/pharmaceutics13081310), 2021-08-21

# Size Distribution Report by Intensity

v2.2

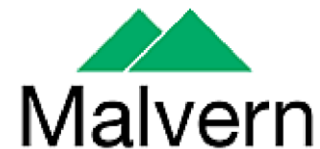

## Sample Details

**Sample Name:** ETL1 (E)

**SOP Name:** mansettings.nano

**General Notes:**

|                                   |                                                                  |
|-----------------------------------|------------------------------------------------------------------|
| <b>File Name:</b> Results.dts     | <b>Dispersant Name:</b> PBS                                      |
| <b>Record Number:</b> 4949        | <b>Dispersant RI:</b> 1.330                                      |
| <b>Material RI:</b> 1.59          | <b>Viscosity (cP):</b> 0.8872                                    |
| <b>Material Absorbance:</b> 0.010 | <b>Measurement Date and Time:</b> Tuesday, September 03, 2019... |

## System

|                                                    |                                        |
|----------------------------------------------------|----------------------------------------|
| <b>Temperature (°C):</b> 25.0                      | <b>Duration Used (s):</b> 100          |
| <b>Count Rate (kcps):</b> 99.2                     | <b>Measurement Position (mm):</b> 4.65 |
| <b>Cell Description:</b> Disposable sizing cuvette | <b>Attenuator:</b> 11                  |

## Results

|                                | <b>Size (d.nm):</b>  | <b>% Intensity:</b> | <b>St Dev (d.nm)</b> |
|--------------------------------|----------------------|---------------------|----------------------|
| <b>Z-Average (d.nm):</b> 115.1 | <b>Peak 1:</b> 200.8 | 86.1                | 69.21                |
| <b>Pdl:</b> 0.266              | <b>Peak 2:</b> 26.77 | 11.9                | 4.898                |
| <b>Intercept:</b> 0.807        | <b>Peak 3:</b> 0.000 | 0.0                 | 0.000                |

**Result quality :** **Good**

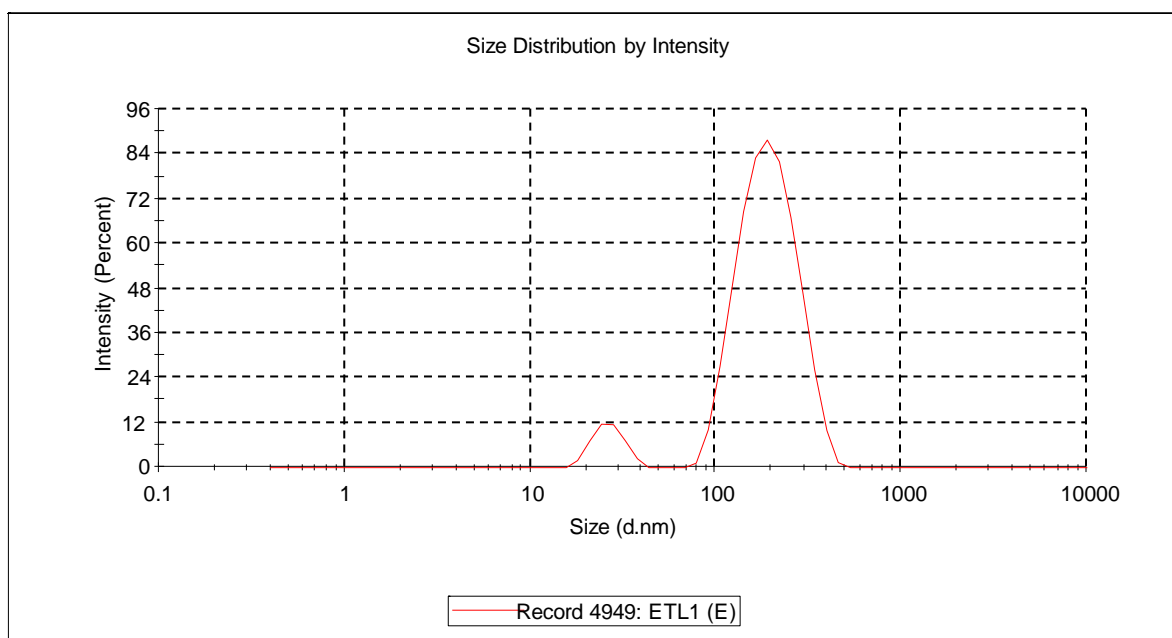

# Size Distribution Report by Intensity

v2.2

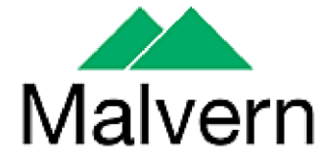

## Sample Details

**Sample Name:** ETL-1 (NE)

**SOP Name:** mansettings.nano

**General Notes:**

|                                   |                                                                  |
|-----------------------------------|------------------------------------------------------------------|
| <b>File Name:</b> Results.dts     | <b>Dispersant Name:</b> PBS                                      |
| <b>Record Number:</b> 4950        | <b>Dispersant RI:</b> 1.330                                      |
| <b>Material RI:</b> 1.59          | <b>Viscosity (cP):</b> 0.8872                                    |
| <b>Material Absorbtion:</b> 0.010 | <b>Measurement Date and Time:</b> Tuesday, September 03, 2019... |

## System

|                                                    |                                        |
|----------------------------------------------------|----------------------------------------|
| <b>Temperature (°C):</b> 25.0                      | <b>Duration Used (s):</b> 100          |
| <b>Count Rate (kcps):</b> 189.1                    | <b>Measurement Position (mm):</b> 4.65 |
| <b>Cell Description:</b> Disposable sizing cuvette | <b>Attenuator:</b> 11                  |

## Results

|                                | <b>Size (d.nm):</b>  | <b>% Intensity:</b> | <b>St Dev (d.nm)</b> |
|--------------------------------|----------------------|---------------------|----------------------|
| <b>Z-Average (d.nm):</b> 152.7 | <b>Peak 1:</b> 214.5 | 78.9                | 127.2                |
| <b>Pdl:</b> 0.422              | <b>Peak 2:</b> 42.65 | 18.0                | 10.85                |
| <b>Intercept:</b> 0.882        | <b>Peak 3:</b> 4826  | 1.1                 | 713.1                |

**Result quality :** Good

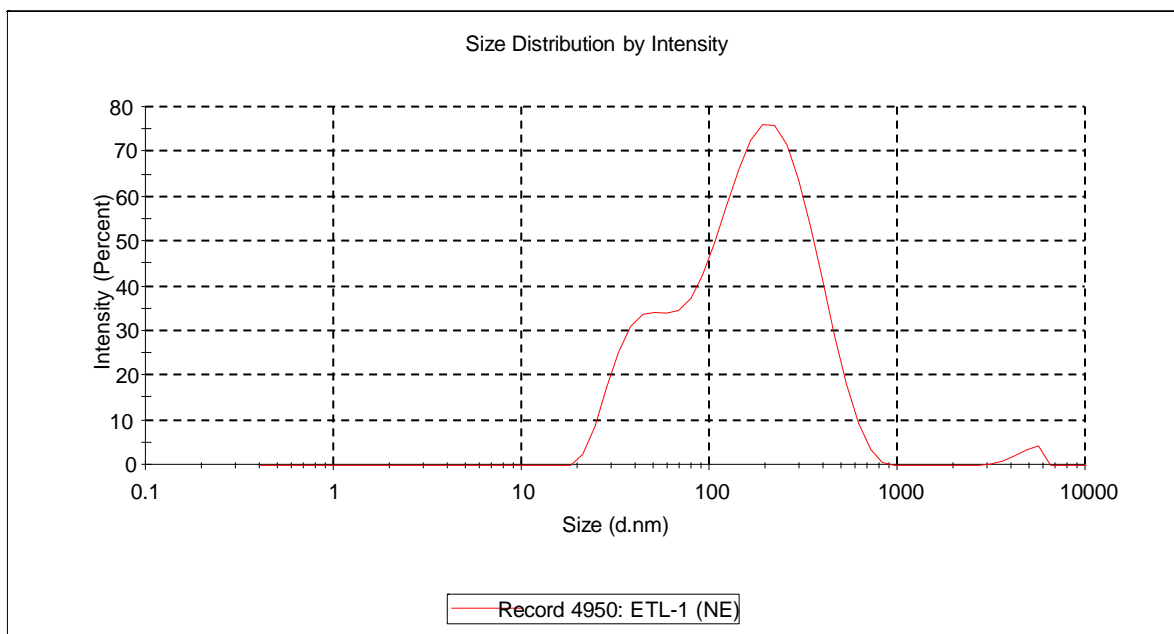

# Size Distribution Report by Intensity

v2.2

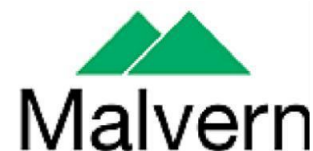

## Sample Details

**Sample Name:** ETL-2 (E)

**SOP Name:** mansetting.nano

**General Notes:**

|                               |                                                                   |
|-------------------------------|-------------------------------------------------------------------|
| <b>File Name:</b> Results.dts | <b>Dispersant Name:</b> PBS                                       |
| <b>Record Number:</b> 5346    | <b>Dispersant RI:</b> 1.330                                       |
| <b>Material RI:</b> 1.59      | <b>Viscosity (cP):</b> 0.8872                                     |
| <b>Material Absorbtion:</b>   | <b>Measurement Date and Time:</b> Monday, October 07, 2019 2:4... |

## System

|                                                    |                                        |
|----------------------------------------------------|----------------------------------------|
| <b>Temperature (°C):</b> 25.0                      | <b>Duration Used(s):</b> 70            |
| <b>Count Rate (kcps):</b> 210.6                    | <b>Measurement Position (mm):</b> 4.65 |
| <b>Cell Description:</b> Disposable sizing cuvette | <b>Attenuator:</b> 10                  |

## Results

|                                | <b>Size (d.nm):</b>  | <b>% Intensity:</b> | <b>St Dev (d.nm)</b> |
|--------------------------------|----------------------|---------------------|----------------------|
| <b>Z-Average (d.nm):</b> 151.8 | <b>Peak 1:</b> 173.8 | 92.6                | 148.2                |
| <b>PdI:</b> 0.352              | <b>Peak 2:</b> 77.19 | 6.3                 | 19.22                |
| <b>Intercept:</b> 0.959        | <b>Peak 3:</b> 2560  | 1.1                 | 0.000                |
| <b>Result quality :</b> Good   |                      |                     |                      |

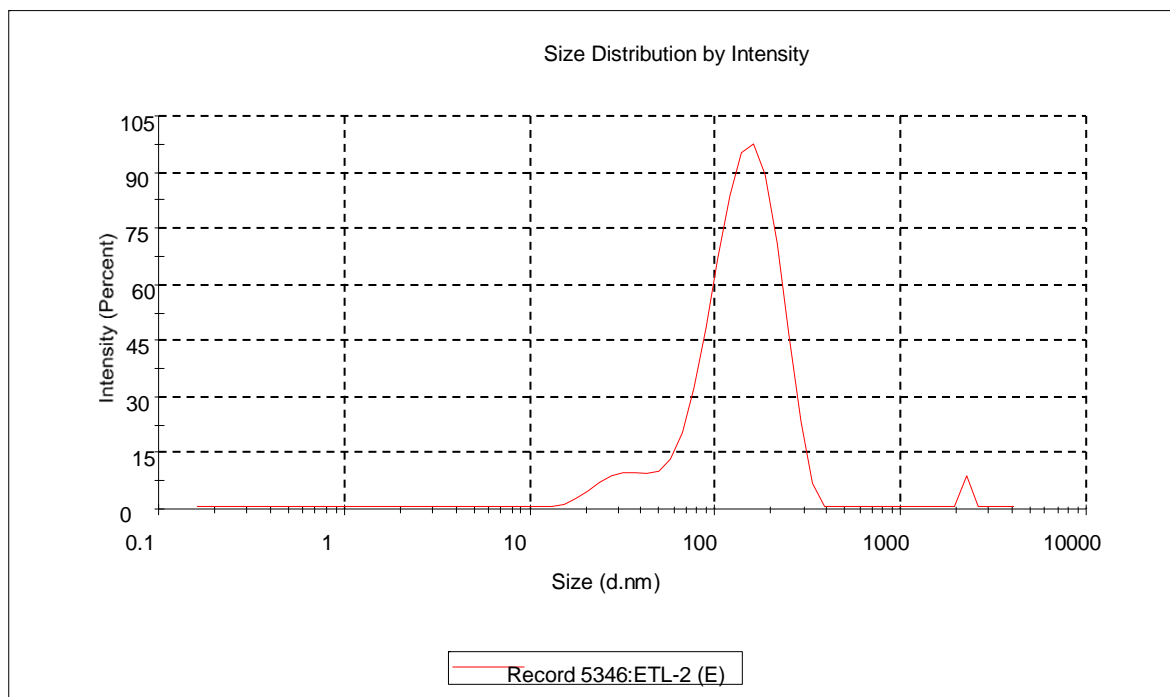

# Size Distribution Report by Intensity

v2.2



## Sample Details

**Sample Name:** ETL-2 (NE)

**SOP Name:** mansettings.nano

**General Notes:**

|                                   |                                                                    |
|-----------------------------------|--------------------------------------------------------------------|
| <b>File Name:</b> Results.dts     | <b>Dispersant Name:</b> PBS                                        |
| <b>Record Number:</b> 3078        | <b>Dispersant RI:</b> 1.330                                        |
| <b>Material RI:</b> 1.59          | <b>Viscosity (cP):</b> 0.8872                                      |
| <b>Material Absorbance:</b> 0.010 | <b>Measurement Date and Time:</b> Friday, March 15, 2019 11:41:... |

## System

|                                                    |                                        |
|----------------------------------------------------|----------------------------------------|
| <b>Temperature (°C):</b> 25.0                      | <b>Duration Used (s):</b> 60           |
| <b>Count Rate (kcps):</b> 443.4                    | <b>Measurement Position (mm):</b> 4.65 |
| <b>Cell Description:</b> Disposable sizing cuvette | <b>Attenuator:</b> 11                  |

## Results

|                                | <b>Size (d.nm):</b>  | <b>% Intensity:</b> | <b>St Dev (d.nm)</b> |
|--------------------------------|----------------------|---------------------|----------------------|
| <b>Z-Average (d.nm):</b> 220.9 | <b>Peak 1:</b> 377.2 | 70.1                | 122.4                |
| <b>PdI:</b> 0.615              | <b>Peak 2:</b> 61.94 | 26.8                | 19.70                |
| <b>Intercept:</b> 0.871        | <b>Peak 3:</b> 5471  | 11.4                | 243.8                |

**Result quality :** Refer to quality report

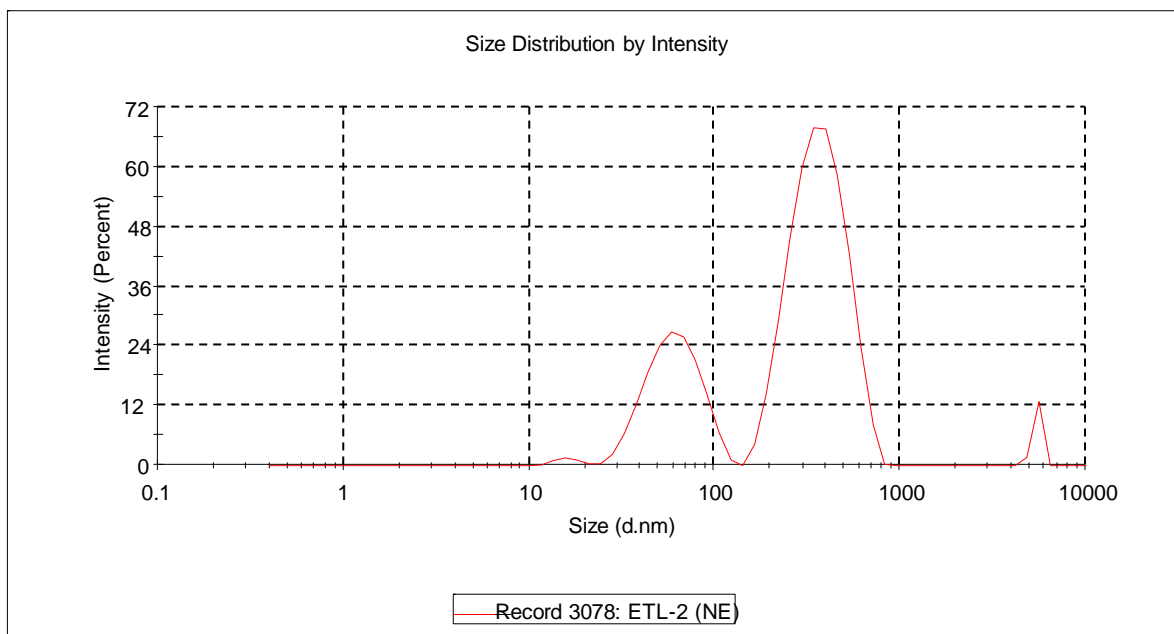

# Size Distribution Report by Intensity

v2.2

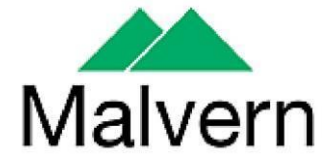

## Sample Details

Sample Name: ETL-3 (E)

SOP Name: mansettings.nano

General Notes:

File Name: Results.dts

Record Number: 5347

Material RI: 1.59

Material Absorbtion: 0.010

Dispersant Name: PBS

Dispersant RI: 1.330

Viscosity (cP): 0.8872

Measurement Date and Time: Monday, October 07, 2019

## System

Temperature (°C): 25.0

Count Rate (kcps): 203.5

Cell Description: Disposable sizing cuvette

Duration Used (s): 70

Measurement Position (mm): 4.65

Attenuator: 10

## Results

|                                | Size (d.nm):         | % Intensity: | St Dev (d.n... |
|--------------------------------|----------------------|--------------|----------------|
| <b>Z-Average (d.nm): 182.9</b> | <b>Peak 1:</b> 152.7 | 97.0         | 385.8          |
| <b>PdI: 0.425</b>              | <b>Peak 2:</b> 1798  | 16.0         | 717.9          |
| <b>Intercept: 0.943</b>        | <b>Peak 3:</b> 0.000 | 0.0          | 0.000          |

Result quality : **Good**

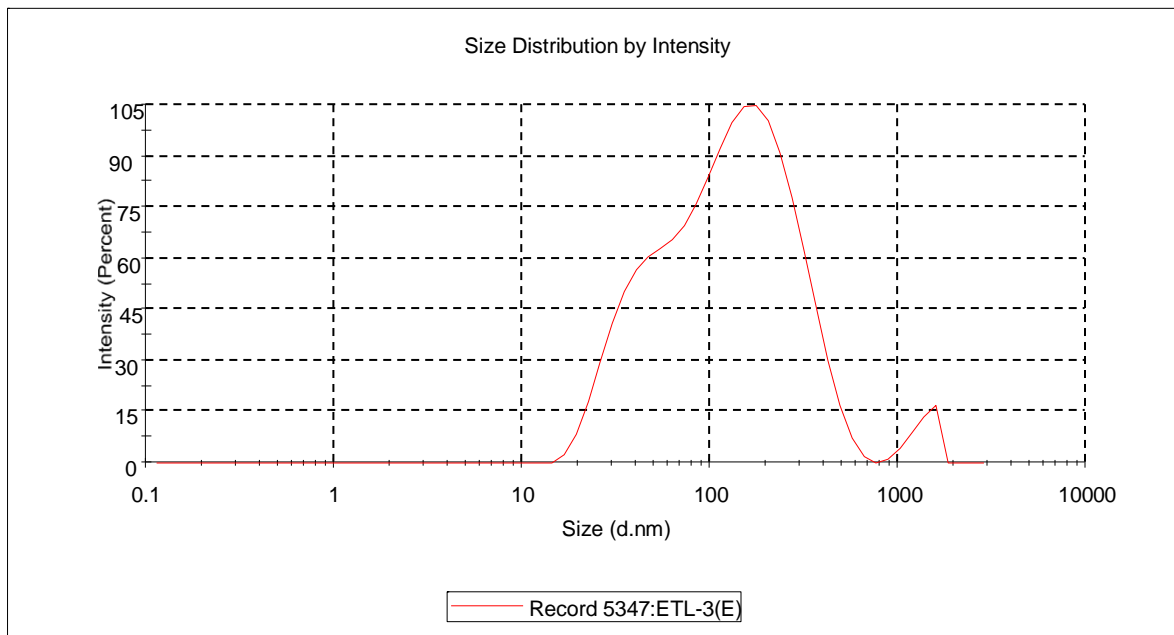

# Size Distribution Report by Intensity

v2.2

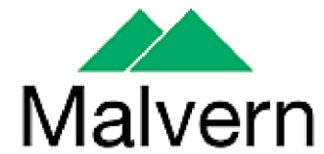

## Sample Details

**Sample Name:** ETL-3 (NE)

**SOP Name:** mansettings.nano

**General Notes:**

|                                       |                                                                    |
|---------------------------------------|--------------------------------------------------------------------|
| <b>File Name:</b> Example Results.dts | <b>Dispersant Name:</b> PBS                                        |
| <b>Record Number:</b> 2000            | <b>Dispersant RI:</b> 1.330                                        |
| <b>Material RI:</b> 1.59              | <b>Viscosity (cP):</b> 0.8872                                      |
| <b>Material Absorbtion:</b> 0.010     | <b>Measurement Date and Time:</b> Tuesday, July 30, 2019 11:19:... |

## System

|                                                    |                                        |
|----------------------------------------------------|----------------------------------------|
| <b>Temperature (°C):</b> 25.0                      | <b>Duration Used (s):</b> 60           |
| <b>Count Rate (kcps):</b> 399.9                    | <b>Measurement Position (mm):</b> 4.65 |
| <b>Cell Description:</b> Disposable sizing cuvette | <b>Attenuator:</b> 10                  |

## Results

|                                | <b>Size (d.nm):</b>  | <b>% Intensity:</b> | <b>St Dev (d.nm):</b> |
|--------------------------------|----------------------|---------------------|-----------------------|
| <b>Z-Average (d.nm):</b> 510.8 | <b>Peak 1:</b> 2103  | 70.6                | 603.5                 |
| <b>Pdl:</b> 0.617              | <b>Peak 2:</b> 229.8 | 61.4                | 46.57                 |
| <b>Intercept:</b> 0.930        | <b>Peak 3:</b> 0.000 | 0.0                 | 0.000                 |

**Result quality :** Good

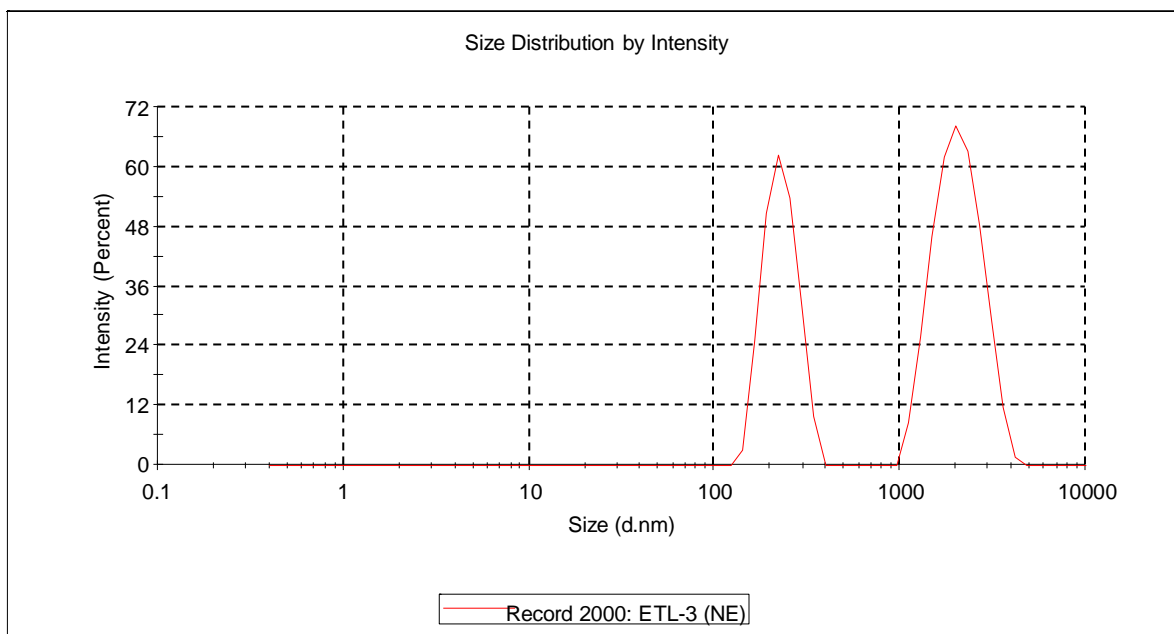

# Size Distribution Report by Intensity

v2.2

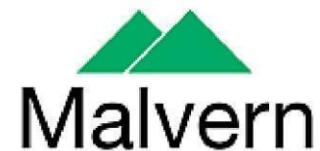

## Sample Details

**Sample Name:** MTL 1 (E)

**SOP Name:** mansettings.nano

**General Notes:**

**File Name:** Example Results.dts

**Record Number:** 1989

**Material RI:** 1.59

**Material Absorbtion:** 0.010

**Dispersant Name:** PBS

**Dispersant RI:** 1.330

**Viscosity(cP):** 0.8872

**Measurement Date and Time:** Tuesday, July 30, 2019 10:24.

## System

**Temperature (°C):** 25.0

**Count Rate (kcps):** 121.7

**Cell Description:** Disposable sizing cuvette

**Duration Used (s):** 80

**Measurement Position (mm):** 4.65

**Attenuator:** 10

## Results

|                                | Size (d.nm):         | %Intensity: | St Dev (d.n... |
|--------------------------------|----------------------|-------------|----------------|
| <b>Z-Average (d.nm):</b> 147.4 | <b>Peak 1:</b> 147.4 | 100.0       | 120.1          |
| <b>Pdl:</b> 0.218              | <b>Peak 2:</b> 0.000 | 0.0         | 0.000          |
| <b>Intercept:</b> 0.765        | <b>Peak 3:</b> 0.000 | 0.0         | 0.000          |

**Result quality:** Good

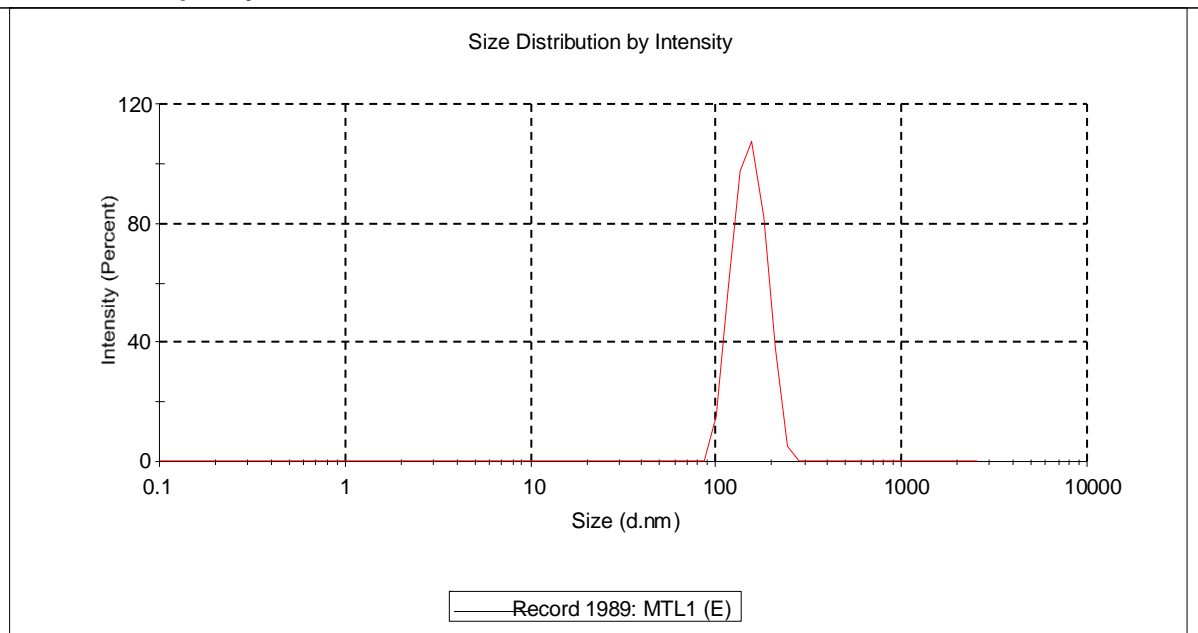

# Size Distribution Report by Intensity

v2.2



## Sample Details

**Sample Name:** MTL 1 (NE)

**SOP Name:** particle size.sop

**General Notes:** Sample(s) was tested according to information provided by customer.

**File Name:** Results.dts

**Dispersant Name:** PBS

**Record Number:** 5041

**Dispersant RI:** 1.330

**Material RI:** 1.59

**Viscosity (cP):** 0.8872

**Material Absorbance:** 0.010

**Measurement Date and Time:** Friday, September 13, 2019 1...

## System

**Temperature (°C):** 25.0

**Duration Used (s):** 60

**Count Rate (kcps):** 380.6

**Measurement Position (mm):** 4.65

**Cell Description:** Disposable sizing cuvette

**Attenuator:** 10

## Results

|                                | Size (d.nm):         | % Intensity: | St Dev (d.nm) |
|--------------------------------|----------------------|--------------|---------------|
| <b>Z-Average (d.nm):</b> 318.5 | <b>Peak 1:</b> 360.2 | 87.5         | 126.8         |
| <b>Pdl:</b> 0.293              | <b>Peak 2:</b> 5223  | 9.5          | 460.3         |
| <b>Intercept:</b> 0.893        | <b>Peak 3:</b> 0.000 | 0.0          | 0.000         |
| <b>Result quality :</b> Good   |                      |              |               |

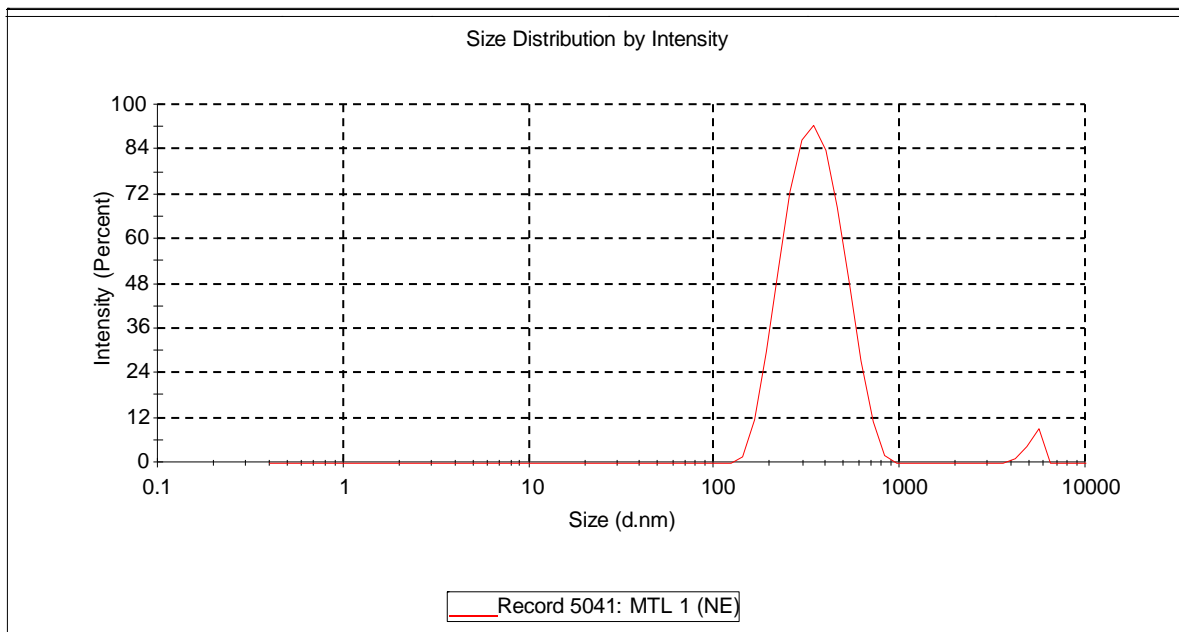



# Size Distribution Report by Intensity

v2.2

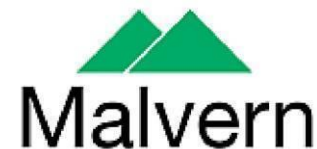

## Sample Details

**Sample Name:** MTL 2 (E)

**SOP Name:** mansettings.nano

**General Notes:**

**File Name:** Results.dts

**Record Number:** 5041

**Material RI:** 1.59

**Material Absorbtion:** 0.010

**Dispersant Name:** PBS

**Dispersant RI:** 1.330

**Viscosity(cP):** 0.8872

**Measurement Date and Time:** Friday, September 13, 2019

## System

**Temperature (°C):** 25.0

**Count Rate (kcps):** 380.6

**Cell Description:** Disposable sizing cuvette

**Duration Used (s):** 60

**Measurement Position (mm):** 4.65

**Attenuator:** 10

## Results

|                          |              |                     |                     |                        |
|--------------------------|--------------|---------------------|---------------------|------------------------|
| <b>Z-Average (d.nm):</b> | <b>167.5</b> | <b>Size (d.nm):</b> | <b>% Intensity:</b> | <b>St Dev (d.n....</b> |
| <b>Pdl:</b>              | <b>0.293</b> | <b>Peak 1:</b>      | 170.2               | 70.3                   |
| <b>Intercept:</b>        | 0.893        | <b>Peak 2:</b>      | 2223                | 2.54                   |
| <b>Result quality:</b>   | <b>Good</b>  | <b>Peak 3:</b>      | 0.000               | 0.0                    |

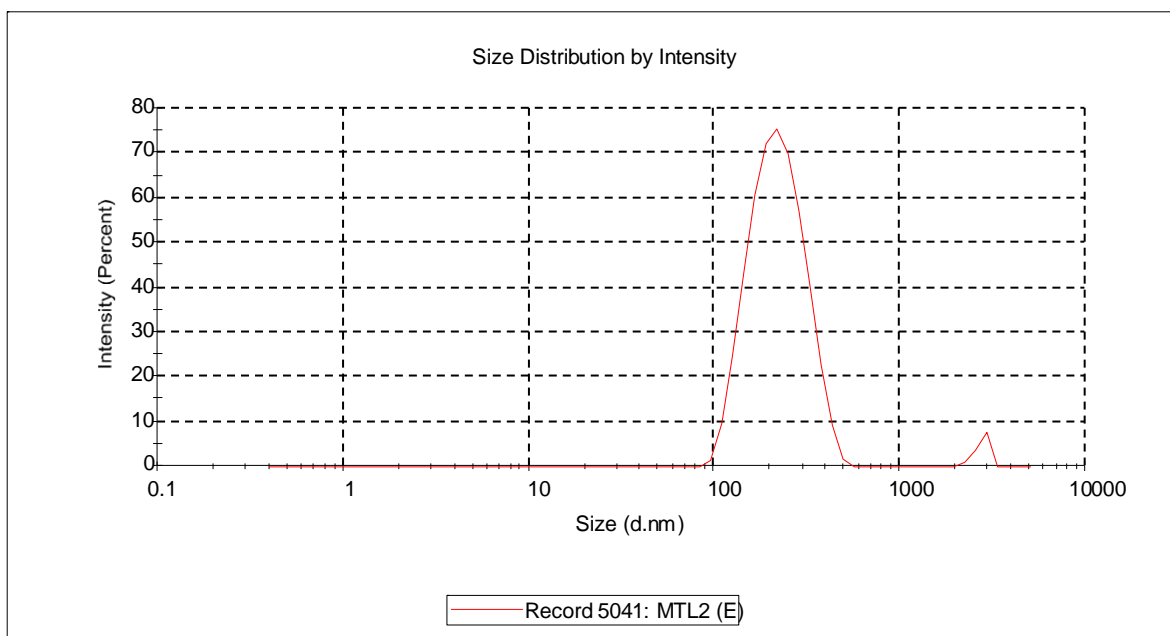

# Size Distribution Report by Intensity

v2.2

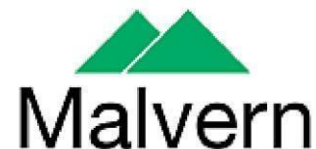

## Sample Details

**Sample Name:** MTL 2 (NE)

**SOP Name:** mansettings.nano

**General Notes:**

**File Name:** Example Results.dts

**Record Number:** 1358

**Material RI:** 1.59

**Material Absorbtion:** 0.010

**Dispersant Name:** PBS

**Dispersant RI:** 1.330

**Viscosity(cP):** 0.8872

**Measurement Date and Time:** Tuesday, July 30, 2019 10:24.

## System

**Temperature (°C):** 25.0

**Count Rate (kcps):** 132.2

**Cell Description:** Disposable sizing cuvette

**Duration Used (s):** 70

**Measurement Position (mm):** 0.65

**Attenuator:** 5

## Results

|                                | Size (d.nm):         | %Intensity: | St Dev (d.n... |
|--------------------------------|----------------------|-------------|----------------|
| <b>Z-Average (d.nm):</b> 341.4 | <b>Peak 1:</b> 253.8 | 68.7        | 149.0          |
| <b>Pdl:</b> 0.465              | <b>Peak 2:</b> 53.12 | 32.2        | 15.47          |
| <b>Intercept:</b> 0.901        | <b>Peak 3:</b> 3955  | 19.1        | 1102           |

**Result quality:** Good

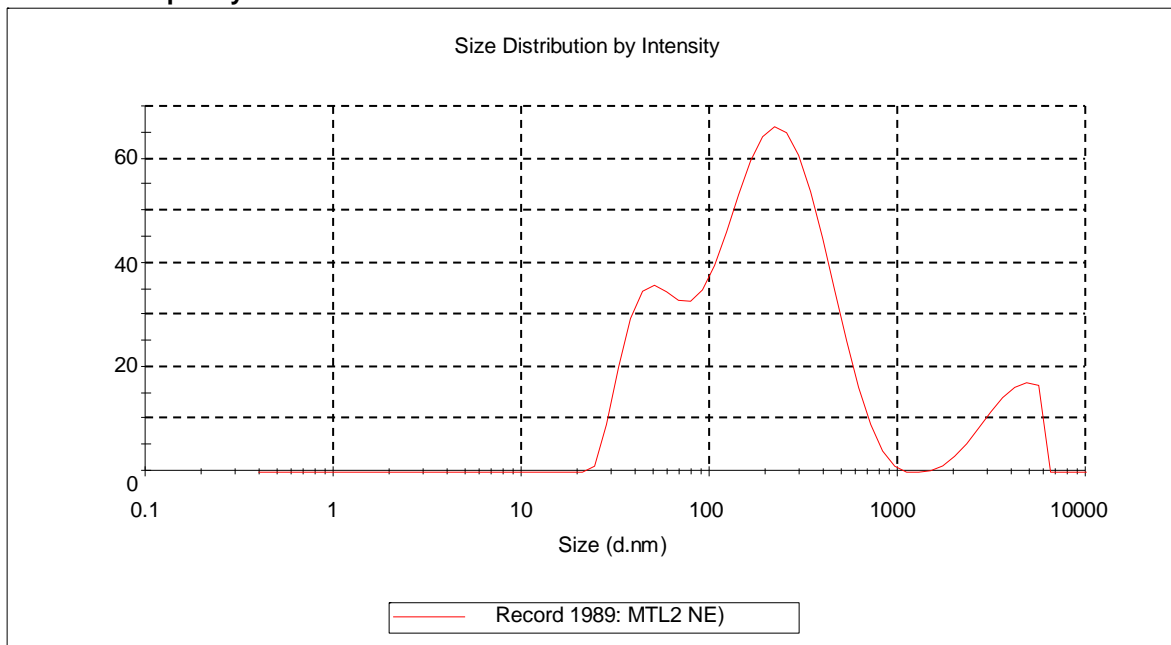

# Size Distribution Report by Intensity

v2.2

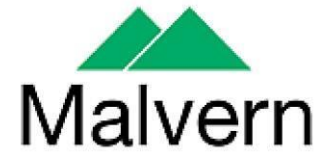

## Sample Details

**Sample Name:** MTL 3 (NE)

**SOP Name:** mansettings.nano

**General Notes:**

**File Name:** Results.dts

**Record Number:** 1358

**Material RI:** 1.59

**Material Absorbtion:** 0.010

**Dispersant Name:** PBS

**Dispersant RI:** 1.330

**Viscosity (cP):** 1.1442

**Measurement Date and Time:** Tuesday, December 24, 2019...

## System

**Temperature (°C):** 25.0

**Count Rate (kcps):** 242.0

**Cell Description:** Disposable sizing cuvette

**Duration Used (s):** 70

**Measurement Position (mm):** 0.65

**Attenuator:** 5

## Results

**Z-Average (d.nm):** 345.9

**PdI:** 0.830

**Intercept:** 0.903

**Result quality:** Good

|         | Size (d.nm): | % Intensity: | St Dev (d.nm): |
|---------|--------------|--------------|----------------|
| Peak 1: | 213.5        | 49.5         | 203.2          |
| Peak 2: | 901.2        | 35.0         | 121.4          |
| Peak 3: | 5332         | 60.1         | 9.6            |

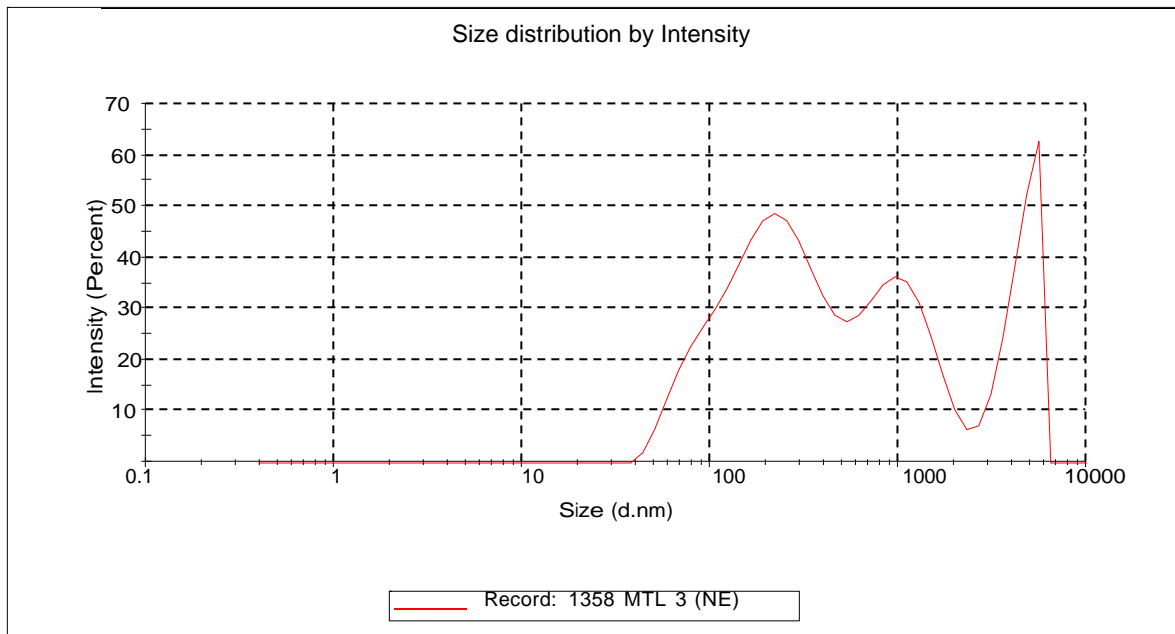

# Size Distribution Report by Intensity

v2.2



## Sample Details

**Sample Name:** MTL 3 (E)

**SOP Name:** mansettings.nano

**General Notes:**

|                                   |                                                                 |
|-----------------------------------|-----------------------------------------------------------------|
| <b>File Name:</b> Results.dts     | <b>Dispersant Name:</b> PBS                                     |
| <b>Record Number:</b> 5227        | <b>Dispersant RI:</b> 1.326                                     |
| <b>Material RI:</b> 1.59          | <b>Viscosity(cP):</b> 0.5476                                    |
| <b>Material Absorbtion:</b> 0.010 | <b>Measurement Date and Time:</b> Wednesday, September 25, 2... |

## System

|                                                    |                                        |
|----------------------------------------------------|----------------------------------------|
| <b>Temperature (°C):</b> 25.0                      | <b>Duration Used (s):</b> 70           |
| <b>Count Rate (kcps):</b> 260.9                    | <b>Measurement Position (mm):</b> 4.65 |
| <b>Cell Description:</b> Disposable sizing cuvette | <b>Attenuator:</b> 10                  |

## Results

|                                | <b>Size (d.nm):</b>  | <b>% Intensity:</b> | <b>St Dev (d.nm)</b> |
|--------------------------------|----------------------|---------------------|----------------------|
| <b>Z-Average (d.nm):</b> 169.6 | <b>Peak 1:</b> 169.6 | 91.0                | 123.2                |
| <b>Pdl:</b> 0.251              | <b>Peak 2:</b> 0.000 | 0.0                 | 0.000                |
| <b>Intercept:</b> 0.897        | <b>Peak 3:</b> 0.000 | 0.0                 | 0.000                |

**Result quality :** **Good**

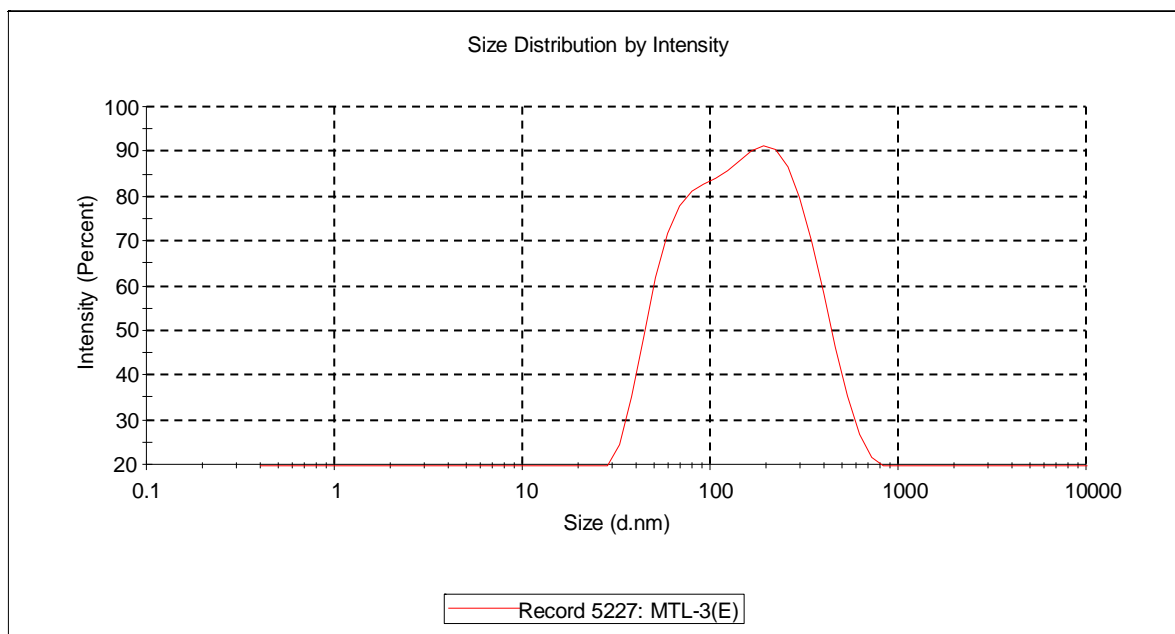

Supplement: s1 [file s1]
